# Supplementary material for: TMPRSS2 Impacts Cytokine Expression in Murine Dendritic Cells
Source: MDPI journal article supplement (doi:10.3390/biomedicines11020419), 2023-02-01
Supplement: s1 [file s1]

## Supplementary material:

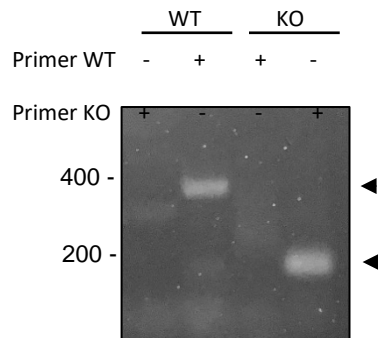

**Figure S1** *TMPRSS2*<sup>-/-</sup> mice genotyping

*TMPRSS2*<sup>-/-</sup> mice were generated by deletion of exons 10–13 through homologue recombination with a targeting vector containing a neomycin resistance gene as selection marker (Kim et al., 2006; [3] main publication). The truncated *TMPRSS2* variant is enzymatically inactive. Genotyping by PCR analysis was carried out using primers WT-for and WT-rev to amplify a 385 bp allele from the wild-type animals (primers described in [3] main publication) and primers KO-for and KO-rev to amplify 180 bps of the neomycin gene.

WT-for 5' ACCTGGAGTATACGGGAACGTGA 3'  
WT-rev 5' GTGAGTGGGTGAAGGTTGGGTAG 3'  
KO-for 5' CTACGCGTCAATTGATGCATCCC 3'  
KO-rev 5' CTGCTAAAGCGCATGCTCCAGAC 3'

## References

[3] Kim, T.S.; Heinlein, C.; Hackman, R.C.; Nelson, P.S. Phenotypic analysis of mice lacking the *Tmprss2*-encoded protease. *Mol. Cell. Biol.* **2006**, *26*, 965–975. <https://doi.org/10.1128/MCB.26.3.965-975.2006>.

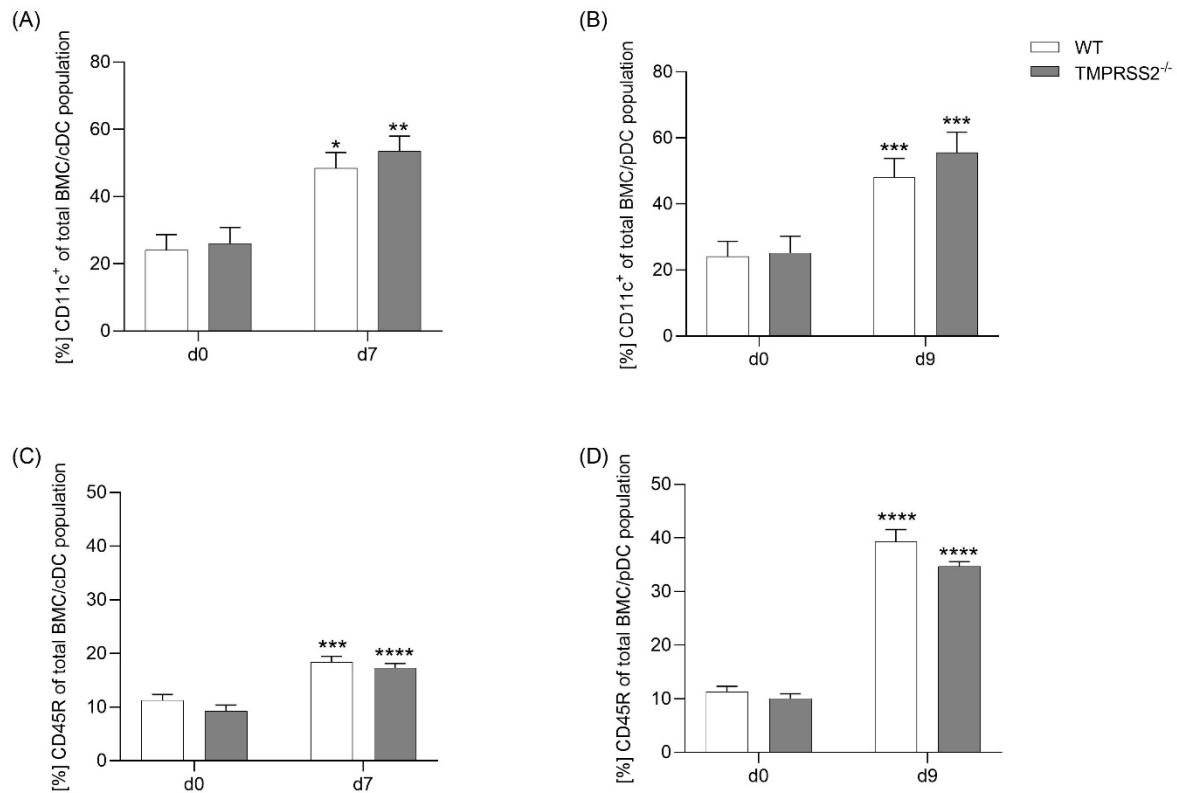

*Figure S2 Differentiation profile of cDCs and pDCs*

Differentiation of pDC and cDC cells from murine bone marrow cells was verified by flow cytometric analysis of CD45R and CD11c targeted cells. Therefore,  $0.1 \times 10^6$  cells were incubated at 4 °C for 10 min with mouse FcR blocking reagent (Miltenyi Biotec, Bergisch Gladbach, Germany), followed by a 15 min incubation with CD45R-APCVio770 and CD11c-FITC antibodies. After washing with FACS buffer (0.5 % BSA, 2 mM EDTA, PBS) and centrifugation for 5 min, 300 xg, cell pellet was resuspended in 100  $\mu$ l FACS buffer and analyzed at MACSQuant® Analyzer 10 flow cytometer. \*p<0.05, \*\*p<0.01, \*\*\*p<0.001 and \*\*\*\*p<0.0001 showed significant differences between day7/day9 and day 0.
